# Supplementary material
Source: Springer Nature journal article supplement (https://www.springermedizin.de/resource/supplementary/12891_2007_438_MOESM1_ESM.pdf/9511414)
Supplement: MOESM1 [file 9511414]

**Randomised population (n = 3,036)**

**Lumiracoxib 100 mg o.d. (n = 757) Lumiracoxib 100 mg b.i.d. (n=1,520)**

**Celecoxib 200 mg o.d. (n = 759)**

**Did not receive study drug (n = 2)**

**Did not receive study drug (n = 1)**

**Did not receive study drug (n = 1)**

**ITT/safety population (n = 755)**

**ITT/safety population (n = 1519)**

**ITT/safety population (n = 758)**

**Discontinuations (n = 402; 53.1%)**

Administrative problems n = 102 (13.5%)  
Due to protocol amendment<sup>†</sup> n = 90 (11.9%)  
Unsatisfactory therapeutic effect n = 97 (12.8%)  
Adverse events n = 96 (12.7%)  
Withdrew consent n = 78 (10.3%)  
    Due to adverse publicity<sup>†</sup> n = 25 (3.3%)  
Protocol violation n = 10 (1.3%)  
Lost to follow-up n = 9 (1.2%)  
Abnormal laboratory value or test result n = 8 (1.1%)

**Discontinuations (n = 792; 52.1%)**

Administrative problems n = 226 (14.9%)  
Due to protocol amendment<sup>†</sup> n = 199 (13.1%)  
Unsatisfactory therapeutic effect n = 158 (10.4%)  
Adverse events n = 187 (12.3%)  
Withdrew consent n = 170 (11.2%)  
    Due to adverse publicity<sup>†</sup> n = 68 (4.5%)  
Protocol violation n = 22 (1.4%)  
Lost to follow-up n = 7 (0.5%)  
Abnormal laboratory value or test result n = 16 (1.1%)  
No longer required treatment n = 3 (0.2%)

**Discontinuations (n = 415; 54.7%)**

Administrative problems n = 119 (15.7%)  
Due to protocol amendment<sup>†</sup> n = 103 (13.6%)  
Unsatisfactory therapeutic effect n = 88 (11.6%)  
Adverse events n = 89 (11.7%)  
Withdrew consent n = 93 (12.3%)  
    Due to adverse publicity<sup>†</sup> n = 27 (3.6%)  
Protocol violation n = 10 (1.3%)  
Lost to follow-up n = 8 (1.1%)  
Abnormal laboratory value or test result n = 5 (0.7%)  
No longer required treatment n = 2 (0.3%)

**Completed (n = 355; 46.9%)**

**Completed (n = 728; 47.9%)**

**Completed (n = 344; 45.3%)**
